# Supplementary material for: m6A Regulates the Stability of Cellular Transcripts Required for Efficient KSHV Lytic Replication
Source: MDPI journal article supplement (doi:10.3390/v15061381), 2023-06-16
Supplement: s1 [file s1]

## **m<sup>6</sup>A regulates the stability of cellular transcripts required for efficient KSHV lytic replication**

Oliver Manners, Belinda Baquero-Perez, Timothy J. Mottram, Ivaylo D. Yonchev, Christopher J. Trevelyan, Katherine L. Harper, Sarah Menezes, Molly R. Patterson, Andrew Macdonald, Stuart A. Wilson, Julie L. Aspden & Adrian Whitehouse

### **Supporting Information**

**Supplementary Figures S1-S4**

**Supplementary Tables S1-S3**

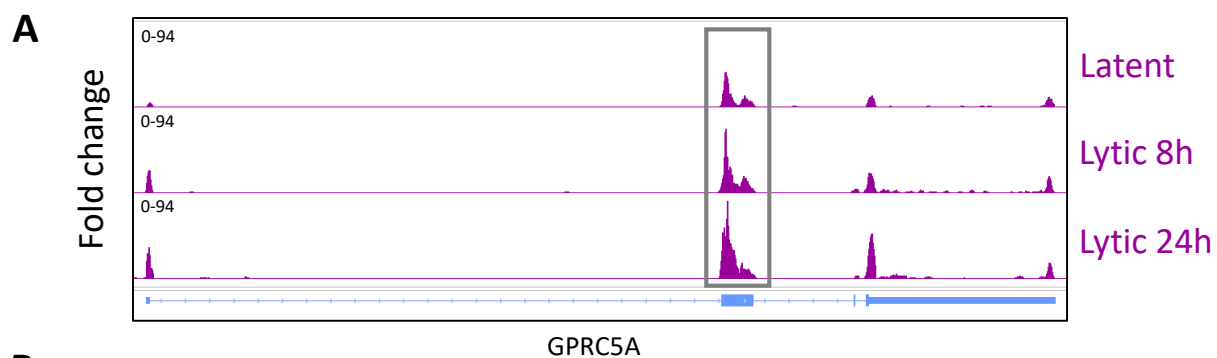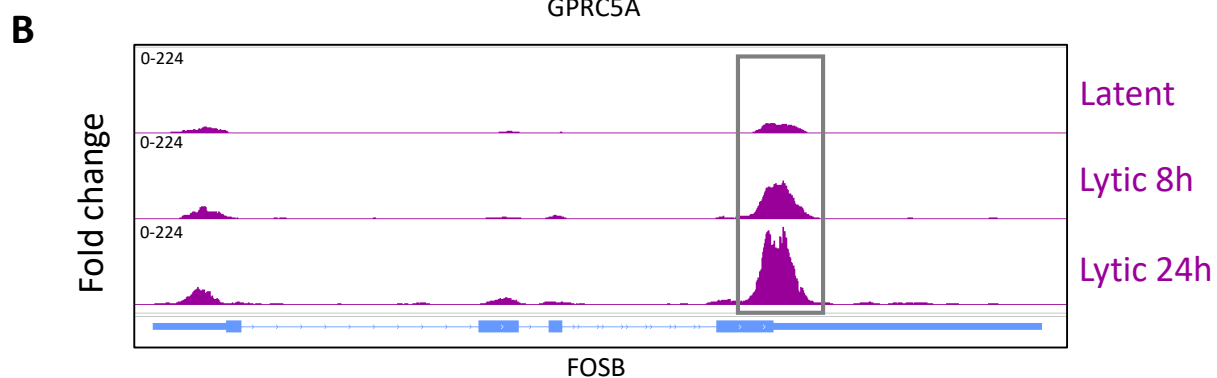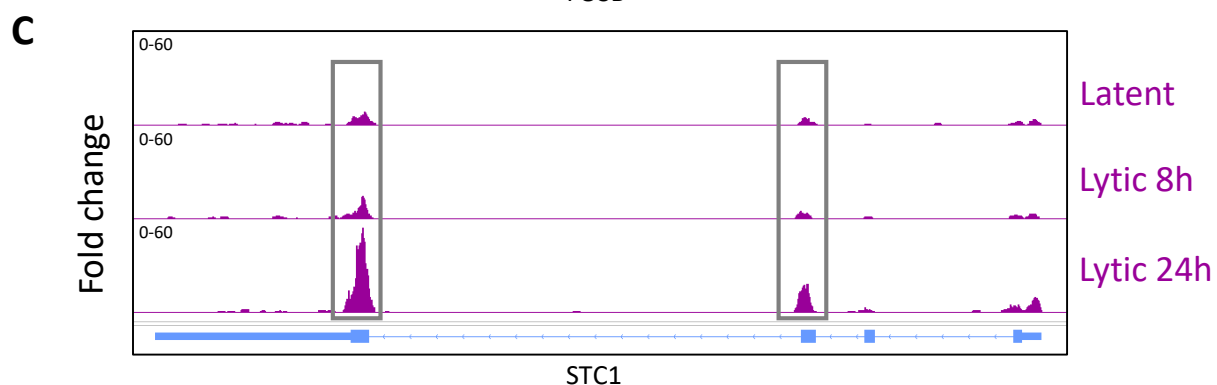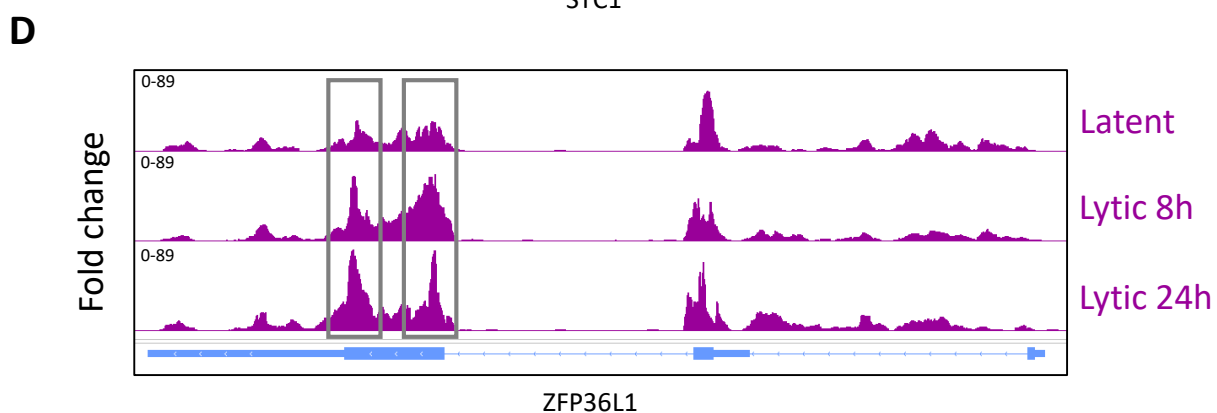

E

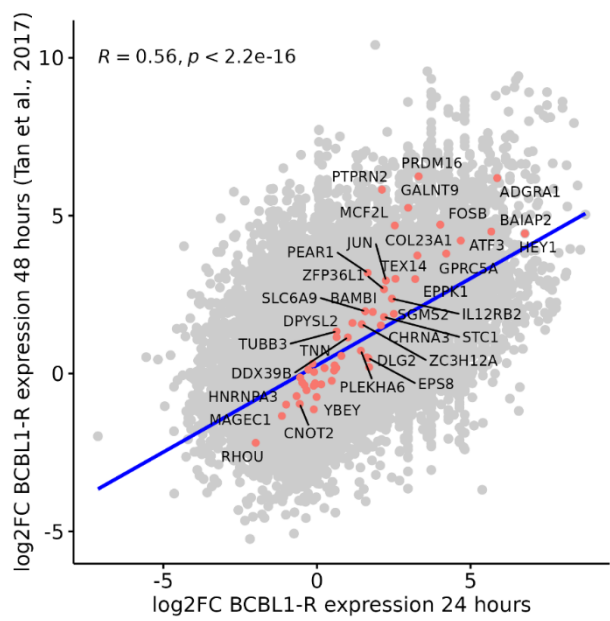

F (i)

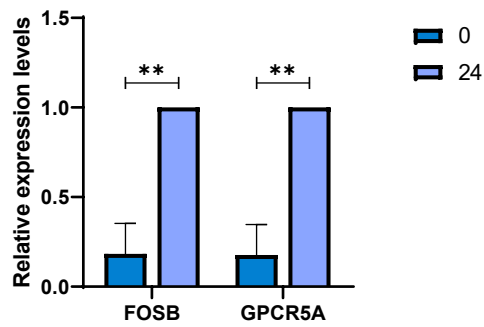

(ii)

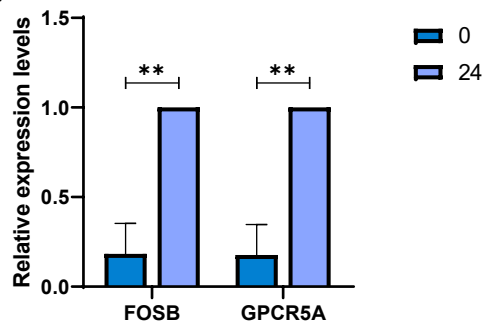

G

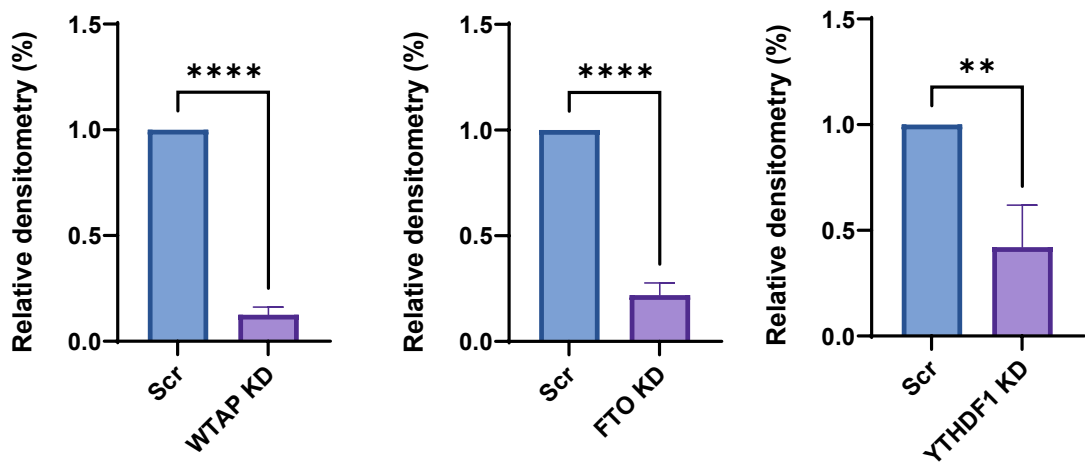

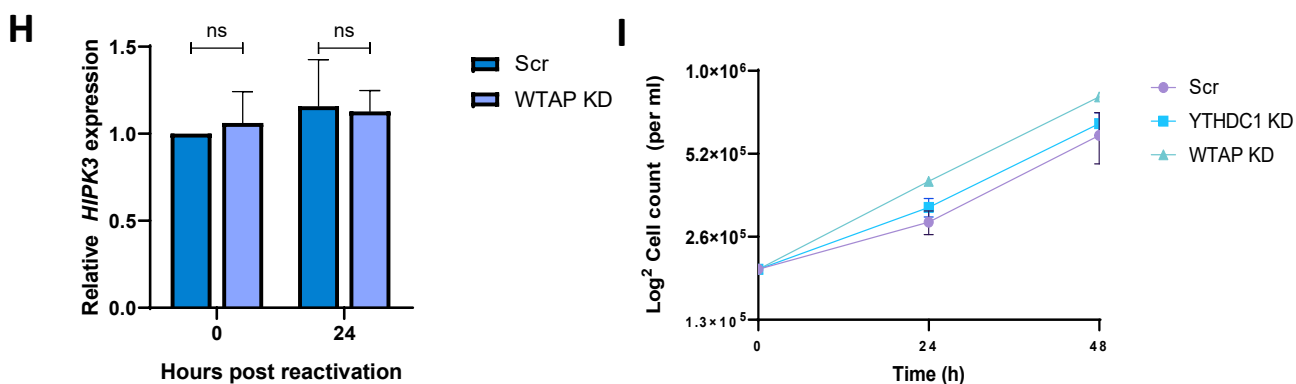

**Figure S1. Differential m<sup>6</sup>A modification of cellular transcripts during KSHV lytic replication.**

Genome sequencing tracks for (A) GPRC5A, (B) FOSB, (C) STC1 and (D) ZFP36L1 from latent and lytic TREX cells depicting input (dark blue) and m<sup>6</sup>A IP (purple) reads on cellular mRNAs. Differentially modified peaks showing an increase in m<sup>6</sup>A modification during lytic replication are indicated by black boxes. (E) Correlation plot between the DESeq2 calculated log<sub>2</sub>-fold changes in gene expression within this study and published BCBL1-R KSHV data [49]. R marks the Pearson correlation coefficient between the datasets. Selected transcripts observed to show differential m<sup>6</sup>A peak modifications are highlighted in red. (F) RT-qPCR analysis of cellular m<sup>6</sup>A-modified transcripts in (i) BCBL1 and (ii) HEK 293 rKSHV.219 cells induced for 24 hours compared to latent levels. (G) Densitometry analysis of westerns blots from Figure 1D,G,J (n=3), \*\*\*\*P<0.0001, \*\*P<0.01. (H). RNA levels of *HIPK3* in Scr- or WTAP shRNA-treated latent and induced TREX-BCBL-1 cells. Data presented as mean ± SD (n=3), \*\*P<0.01. (I) Proliferation rate of Scr-, WTAP and YTHDF1 shRNA-treated cell lines. Cells were counted over 48 hours to measure cell proliferation (n=2 biologically independent samples).

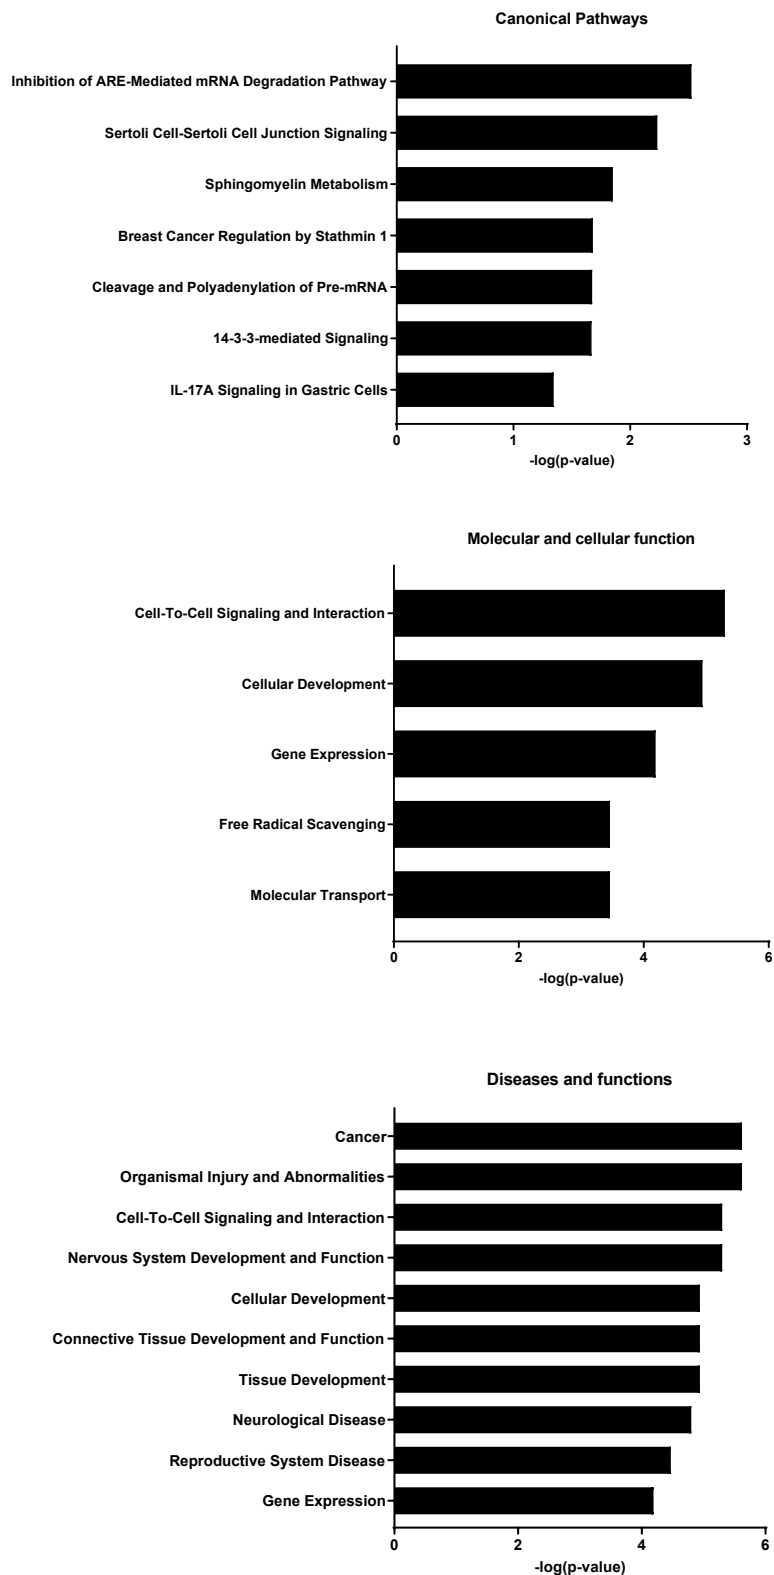

**Figure S2. Ingenuity pathway analysis (IPA).** Analysis identified that the differentially m<sup>6</sup>A modified mRNAs were associated with pathways involved RNA processing and cell signalling. Similarly, predicted molecular and cellular functions and diseases identified cell-to-cell signalling, gene expression and cancer-related pathways.

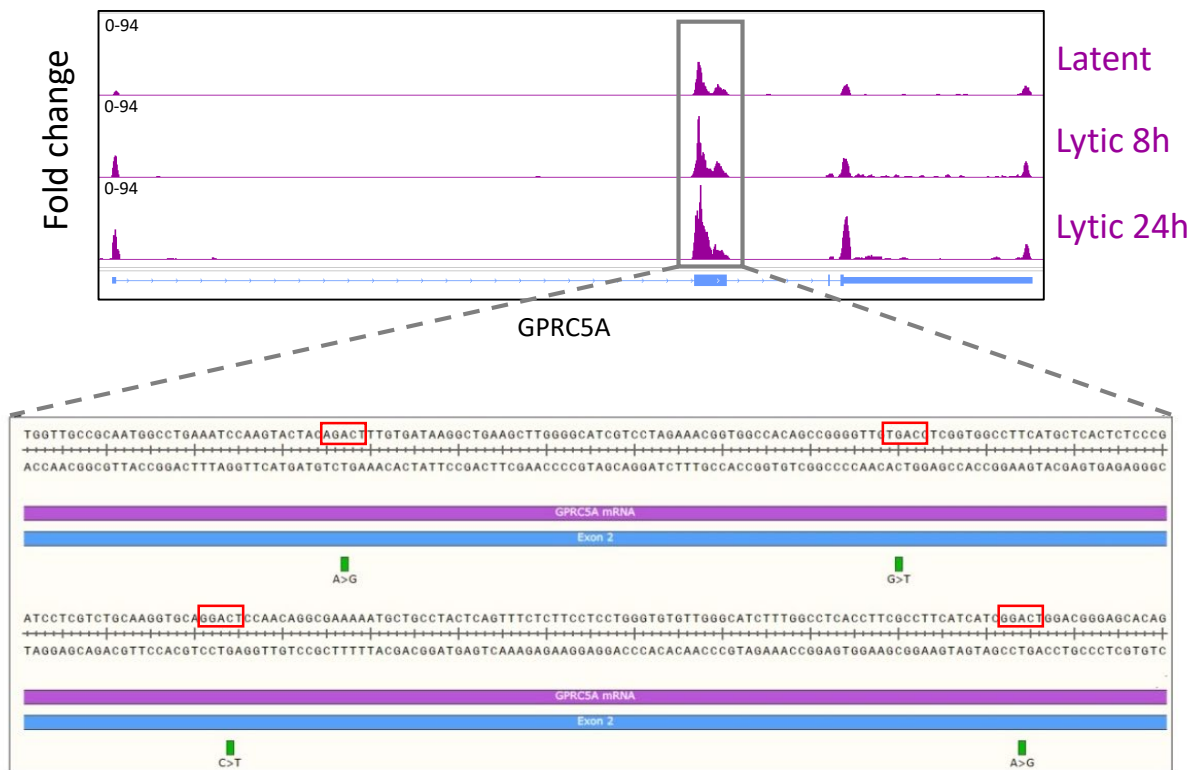

**Figure S3. Mutation of DRACH sequences within GPRC5A to abolish the differentially modified m<sup>6</sup>A peak during KSHV lytic replication.** Site directed mutagenesis was carried out to abrogate 4 DRACH sequences of GPRC5A in close proximity to the m<sup>6</sup>A peak identified as differentially modified during KSHV lytic replication. Consensus DRACH sequences are highlighted with red box.

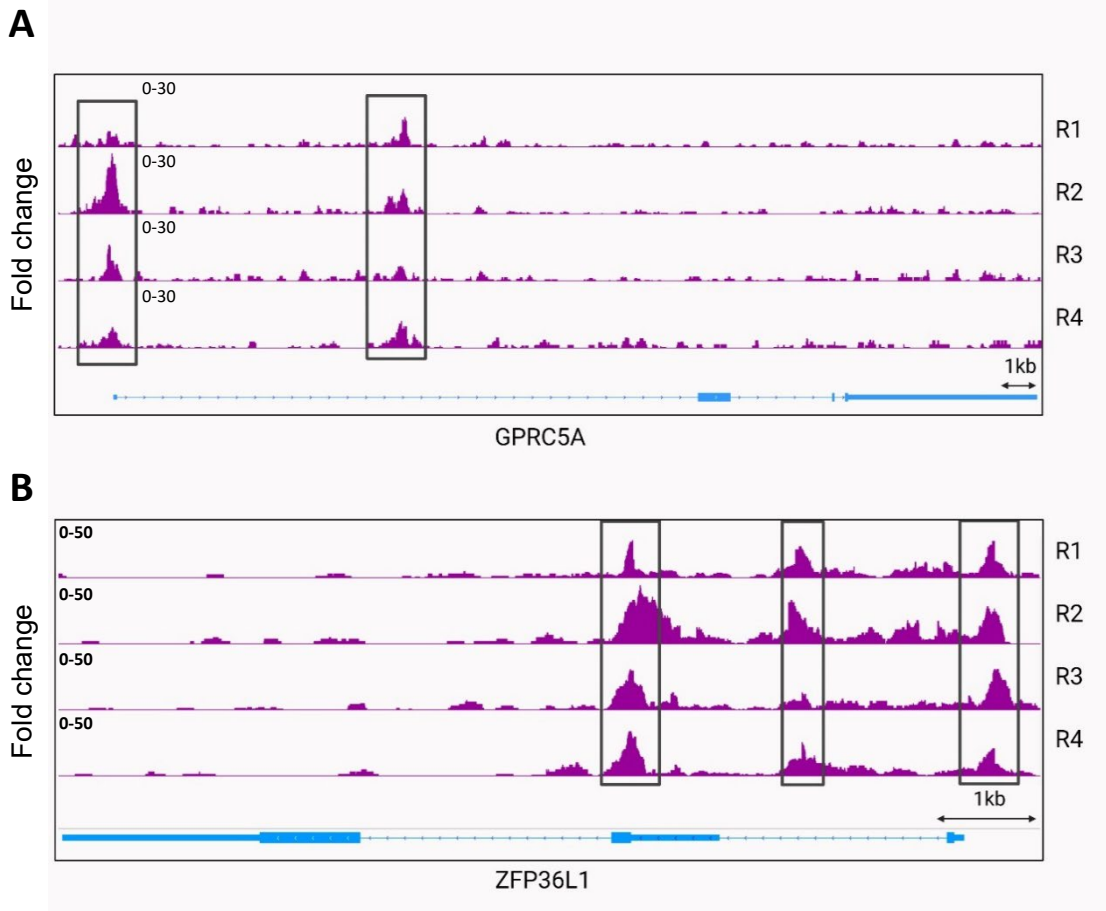

**Figure S4. RTA binds the promoters and internally within *GPRC5A* and *ZFP36L1*.** Genome sequencing tracks from lytic TREX cells depicting RTA-CHIP peaks within (A) *GPRC5A* and (B) *ZFP36L1* genes. Experiments were performed in Papp et al 2019 (52).

| Gene name                       | Forward                        | Reverse                           |
|---------------------------------|--------------------------------|-----------------------------------|
| FOSB                            | 5'-GAAATGCCCCGGTTCCTTC-3'      | 5'-GAGGGTGGGTTCACAAAG-3'          |
| FTO                             | 5'-TCTGACCCCCAAAGATGATG-3'     | 5'-CTCGGAGAATTAGTTTAGGATATTTCA-3' |
| GAPDH                           | 5'-TGTCAGTGGTGGACCTGAC-3'      | 5'-GTGGTCGTTGAGGGCAATG-3'         |
| GPRC5A                          | 5'-CCTTTCCCTGTTGGTGATTCT -3'   | 5'-AGACATTGACGTTGGTCCTATTG-3'     |
| JUN                             | 5'-CGCCTGATAATCCAGTCCA-3'      | 5'-TTCTTGGGGCACAGGAAGT-3'         |
| ORF47                           | 5'-CGCGGTGCTTCGAAGATTG-3'      | 5'-CGAGTCTGACTTCCGCTAA-3'         |
| ORF57                           | 5'-GCCATAATCAAGCGTACTGG-3'     | 5'-GCAGACAAATATTGCGGTGT-3'        |
| PLEKHA6                         | 5'-CCACCAGGCAAGAGGTAGAG-3'     | 5'-GCACAACGCCAACTTTGTT-3'         |
| STC1                            | 5'-AGGCGGAGCAGAATGACTC-3'      | 5'-GTTGAGGCAACGAACCACTT-3'        |
| WTAP                            | 5'-TTCCCAAGAAGGTTTCGATTG-3'    | 5'-TGCAGACTCCTGCTGTTGTT-3'        |
| YTHDF1                          | 5'-ATAACCAGCTCCGGCACAT-3'      | 5'-GGGAGTTTGTGACCGGTTT-3'         |
| ZC3H12A                         | 5'-TCTGTGGGAATTTGAGGACAG-3'    | 5'-GTGGATCTCCGTGGATGAATAG-3'      |
| ZFP36L1                         | 5'-GCGAAGTTTTATGCAAGGGTAA-3'   | 5'-GTGCCCACTGCCTTTCTG-3'          |
| FOSB Control                    | 5'-GGAGAGCTGGTGACTTTGGG-3'     | 5'-AGAGCCAACAGTCAGCTGGG-3'        |
| FOSB m <sup>6</sup> A           | 5'-CTCCCTCCTCGCTCTGTGAA-3'     | 5'-CAAGTCTCTCTCCCCCATGT-3'        |
| GAPDH 1                         | 5'-GCATCTTCTTTTGCCTCGCC-3'     | 5'-TTGACTCCGACCTTCACCTTCC-3'      |
| GAPDH 2                         | 5'-TGCACCACCAACTGCTTA-3'       | 5'-ATGAGTCCTTCCACGATACC-3'        |
| GPRC5A control                  | 5'-CCGAGATCTAATCTCCCCCTA-3'    | 5'-GGGCTTGTGCTAGTGAGGTC-3'        |
| GPRC5A m <sup>6</sup> A         | 5'-CTCACTCTCCCGATCCTCGT-3'     | 5'-GAAACTGAGTAGGCAGCATT-3'        |
| JUN Ctrl                        | 5'-AGCGCCTGATAATCCAGTCC-3'     | 5'-ATCTGTACGTTCTTGGGGC-3'         |
| JUN m <sup>6</sup> A            | 5'-ACCTTGAAAGCTCAGAACTCGG-3'   | 5'-TAAGCTGTGCCACCTGTTCC-3'        |
| SLC39A14 control                | 5'-GCAGGATCTAATACATCGGTATGG-3' | 5'-TGGTTGAGTAGGGCCTTCAG-3'        |
| SLC39A14 m <sup>6</sup> A       | 5'-GGACAGATCCAGATTGGGTAG-3'    | 5'-AGGGCCCCGACTTCCAGT-3'          |
| ZFP36L1 control                 | 5'-GGCACACACACATTAAGATGAA-3'   | 5'-AGAGAAATAGAAAGCGACGGT-3'       |
| ZFP36L1 m <sup>6</sup> A site 1 | 5'-GGTTGCCTGCTGGACAGAAA -3'    | 5'-TTCTGGTGGAACTTGGAGCTG-3'       |
| ZFP36L1 m <sup>6</sup> A site 2 | 5'-CAGGATTCTCTCTCGGACCA -3'    | 5'-TCCAAGGTCGGGGAGTCT-3'          |
| WTAP shRNA KD                   | TRCN0000231423                 |                                   |
| FTO shRNA KD                    | TRCN0000246247                 |                                   |
| YTHDF1 shRNA KD                 | TRCN0000286871                 |                                   |
| GPRC5A shRNA KD1                | TRCN0000005628                 |                                   |
| GPRC5A shRNA KD2                | TRCN0000005632                 |                                   |

**Table S1. List of primer sequences.**



|          | Raw values (IGV) |      |      |       |       |      | Relative values (IGV) |      |       |      |       |       | Relative expression change (DESeq2) |        | Dark grey = low expression |                   |
|----------|------------------|------|------|-------|-------|------|-----------------------|------|-------|------|-------|-------|-------------------------------------|--------|----------------------------|-------------------|
|          | R1               |      |      | R2    |       |      | R1                    |      |       | R2   |       |       | R1+R2                               |        |                            |                   |
| Gene     | 0h               | 8h   | 20h  | 0h    | 8h    | 20h  | 0h                    | 8h   | 20h   | 0h   | 8h    | 20h   | 0h                                  | 20h    | Methylation change         | Expression change |
| ADIRF    | 0.16             | 0.08 | 0.05 | 1.67  | 0.67  | 0.09 | 1.00                  | 0.50 | 0.31  | 1.00 | 0.40  | 0.05  |                                     |        | Decrease                   |                   |
| ADGRA1   | 0.04             | 0.08 | 0.06 | 0.05  | 0.16  | 0.16 | 1.00                  | 2.00 | 1.50  | 1.00 | 3.20  | 3.20  |                                     |        | Increase                   |                   |
| ATF3     | 0.04             | 0.04 | 0.32 | 0.05  | 0.10  | 0.19 | 1.00                  | 1.00 | 8.00  | 1.00 | 2.00  | 3.80  | 1.00                                | 25.67  | Increase                   | Increase          |
| BAIAP2   | 0.02             | 0.03 | 0.17 | 0.12  | 0.19  | 0.21 | 1.00                  | 1.50 | 8.50  | 1.00 | 1.58  | 1.75  | 1.00                                | 51.12  | Increase                   | Increase          |
| BAMBI    | 1.39             | 1.04 | 1.58 | 5.76  | 7.04  | 1.49 | 1.00                  | 0.75 | 1.14  | 1.00 | 1.22  | 0.26  | 1.00                                | 3.53   | Decrease                   | Increase          |
| BRD9     | 1.02             | 0.82 | 0.89 | 16.00 | 10.00 | 2.14 | 1.00                  | 0.80 | 0.87  | 1.00 | 0.63  | 0.13  | 1.00                                | 0.94   | Decrease                   | Decrease          |
| CHRNA3   | 0.02             | 0.04 | 0.38 | 0.04  | 0.25  | 0.29 | 1.00                  | 2.00 | 19.00 | 1.00 | 6.25  | 7.25  | 1.00                                | 4.23   | Increase                   | Increase          |
| CNOT2    | 0.24             | 0.21 | 0.21 | 2.76  | 2.30  | 0.24 | 1.00                  | 0.88 | 0.88  | 1.00 | 0.83  | 0.09  | 1.00                                | 0.68   | Decrease                   | Decrease          |
| COL23A1  | 0.08             | 0.12 | 0.05 | 0.30  | 0.24  | 0.09 | 1.00                  | 1.50 | 0.63  | 1.00 | 0.80  | 0.30  | 1.00                                | 9.64   | Decrease                   | Increase          |
| DLG2     | 0.01             | 0.01 | 0.05 | 0.05  | 0.04  | 0.02 | 1.00                  | 1.00 | 5.00  | 1.00 | 0.87  | 0.43  | 1.00                                | 3.07   | Decrease                   | Increase          |
| DPYSL2   | 0.05             | 0.02 | 0.34 | 0.03  | 0.31  | 0.28 | 1.00                  | 0.40 | 6.80  | 1.00 | 10.33 | 9.33  | 1.00                                | 2.23   | Increase                   | Increase          |
| EPPK1    | 0.33             | 0.23 | 0.23 | 1.93  | 1.87  | 0.72 | 1.00                  | 0.70 | 0.70  | 1.00 | 0.97  | 0.37  | 1.00                                | 9.18   | Decrease                   | Increase          |
| EPS8     | 0.05             | 0.04 | 0.11 | 0.07  | 0.20  | 0.20 | 1.00                  | 0.80 | 2.20  | 1.00 | 2.86  | 2.86  | 1.00                                | 3.18   | Increase                   | Increase          |
| FOSB     | 0.06             | 0.12 | 1.74 | 0.63  | 3.02  | 1.94 | 1.00                  | 2.00 | 29.00 | 1.00 | 4.79  | 3.08  | 1.00                                | 16.15  | Increase                   | Increase          |
| GALNT9   | 0.01             | 0.04 | 0.04 | 0.05  | 0.06  | 0.06 | 1.00                  | 4.00 | 4.00  | 1.00 | 1.20  | 1.20  | 1.00                                | 7.83   | Increase                   | Increase          |
| GOLM1    | 0.22             | 0.20 | 0.09 | 1.06  | 1.91  | 0.09 | 1.00                  | 0.91 | 0.41  | 1.00 | 1.80  | 0.08  | 1.00                                | 1.47   | Decrease                   | Increase          |
| GPRC5A   | 0.07             | 0.07 | 0.70 | 0.88  | 2.79  | 1.18 | 1.00                  | 1.00 | 10.00 | 1.00 | 3.17  | 1.34  | 1.00                                | 18.49  | Increase                   | Increase          |
| HEY1     | 0.01             | 0.03 | 0.22 | 0.03  | 0.80  | 0.22 | 1.00                  | 3.00 | 22.00 | 1.00 | 26.67 | 7.33  | 1.00                                | 109.04 | Increase                   | Increase          |
| hnRNPA3  | 0.31             | 0.21 | 0.04 | 3.07  | 3.31  | 0.15 | 1.00                  | 0.68 | 0.13  | 1.00 | 1.08  | 0.05  | 1.00                                | 0.50   | Decrease                   | Decrease          |
| IL12RB2  | 0.01             | 0.01 | 0.36 | 0.04  | 0.08  | 0.06 | 1.00                  | 1.00 | 36.00 | 1.00 | 2.00  | 1.50  | 1.00                                | 5.43   | Increase                   | Increase          |
| ILF3     | 0.04             | 0.07 | 0.47 | 0.10  | 2.08  | 0.73 | 1.00                  | 1.75 | 11.75 | 1.00 | 20.80 | 7.30  | 1.00                                | 0.93   | Decrease                   | Decrease          |
| JTB      | 0.09             | 0.05 | 0.02 | 1.07  | 0.16  | 0.04 | 1.00                  | 0.56 | 0.22  | 1.00 | 0.15  | 0.04  | 1.00                                | 0.96   | Decrease                   | Decrease          |
| JUN      | 0.45             | 0.39 | 6.46 | 5.41  | 19.00 | 3.64 | 1.00                  | 0.87 | 14.36 | 1.00 | 3.51  | 0.67  | 1.00                                | 4.74   | Increase                   | Increase          |
| MAGEC1   | 0.10             | 0.10 | 0.05 | 1.14  | 0.65  | 0.07 | 1.00                  | 1.00 | 0.50  | 1.00 | 0.57  | 0.06  | 1.00                                | 0.45   | Decrease                   | Decrease          |
| MCF2L    | 0.01             | 0.07 | 0.12 | 0.37  | 0.44  | 0.35 | 1.00                  | 7.00 | 12.00 | 1.00 | 1.19  | 0.95  | 1.00                                | 5.79   | Increase                   | Increase          |
| PABPN1   | 0.47             | 0.33 | 0.44 | 1.85  | 1.52  | 0.17 | 1.00                  | 0.70 | 0.94  | 1.00 | 0.82  | 0.09  | 1.00                                | 0.68   | Decrease                   | Decrease          |
| PCF11    | 0.44             | 0.28 | 0.37 | 2.74  | 2.77  | 0.38 | 1.00                  | 0.64 | 0.84  | 1.00 | 1.01  | 0.14  | 1.00                                | 1.49   | Decrease                   | Increase          |
| PCNX1    | 0.04             | 0.04 | 0.60 | 0.62  | 1.16  | 1.16 | 1.00                  | 1.00 | 15.00 | 1.00 | 1.87  | 1.87  | 1.00                                | 0.82   | Increase                   | Decrease          |
| PEAR1    | 0.01             | 0.03 | 0.06 | 0.08  | 0.32  | 0.17 | 1.00                  | 3.00 | 6.00  | 1.00 | 4.00  | 2.13  | 1.00                                | 3.14   | Increase                   | Increase          |
| PILRB    | 0.06             | 0.04 | 0.48 | 0.16  | 1.03  | 0.63 | 1.00                  | 0.67 | 8.00  | 1.00 | 6.44  | 3.94  | 1.00                                | 1.73   | Increase                   | Increase          |
| PLEKHA6  | 0.02             | 0.05 | 0.30 | 0.05  | 0.38  | 0.47 | 1.00                  | 2.50 | 15.00 | 1.00 | 7.60  | 9.40  | 1.00                                | 2.70   | Increase                   | Increase          |
| PPP2R2D  | 1.01             | 0.58 | 0.77 | 5.18  | 7.96  | 1.18 | 1.00                  | 0.57 | 0.76  | 1.00 | 1.54  | 0.23  | 1.00                                | 0.90   | Decrease                   | Decrease          |
| PRDM16   | 0.03             | 0.05 | 0.11 | 0.01  | 0.17  | 0.22 | 1.00                  | 1.67 | 3.67  | 1.00 | 17.00 | 22.00 | 1.00                                | 9.91   | Increase                   | Increase          |
| PTPRN2   | 0.01             | 0.04 | 0.10 | 0.03  | 0.48  | 0.59 | 1.00                  | 4.00 | 10.00 | 1.00 | 16.00 | 19.67 | 1.00                                | 4.33   | Increase                   | Increase          |
| RBM12B   | 4.13             | 3.07 | 0.90 | 58.00 | 32.00 | 4.64 | 1.00                  | 0.74 | 0.22  | 1.00 | 0.55  | 0.08  | 1.00                                | 1.10   | Decrease                   | Increase          |
| RFTN1    | 0.30             | 0.27 | 0.02 | 1.68  | 0.99  | 0.12 | 1.00                  | 0.90 | 0.07  | 1.00 | 0.59  | 0.07  | 1.00                                | 0.63   | Decrease                   | Decrease          |
| RhoU     | 0.24             | 0.19 | 0.92 | 2.08  | 4.37  | 3.81 | 1.00                  | 0.79 | 3.83  | 1.00 | 2.10  | 1.83  | 1.00                                | 0.25   | Increase                   | Decrease          |
| SDF4     | 0.02             | 0.06 | 0.33 | 0.11  | 0.50  | 0.42 | 1.00                  | 3.00 | 16.50 | 1.00 | 4.55  | 3.82  | 1.00                                | 1.55   | Increase                   | Increase          |
| SGMS2    | 0.06             | 0.11 | 0.89 | 0.37  | 5.77  | 1.13 | 1.00                  | 1.83 | 14.83 | 1.00 | 15.59 | 3.05  | 1.00                                | 5.67   | Increase                   | Increase          |
| SLC25A25 | 0.06             | 0.05 | 0.26 | 0.09  | 1.21  | 0.12 | 1.00                  | 0.83 | 4.33  | 1.00 | 13.44 | 1.33  | 1.00                                | 3.25   | Increase                   | Increase          |
| SLC6A9   | 0.03             | 0.05 | 0.32 | 0.08  | 1.45  | 0.27 | 1.00                  | 1.67 | 10.67 | 1.00 | 18.13 | 3.38  | 1.00                                | 2.97   | Increase                   | Increase          |
| STC1     | 0.03             | 0.09 | 0.52 | 0.21  | 0.40  | 0.45 | 1.00                  | 3.00 | 17.33 | 1.00 | 1.90  | 2.14  | 1.00                                | 4.54   | Increase                   | Increase          |
| TEX14    | 0.01             | 0.03 | 0.09 | 0.06  | 0.03  | 0.13 | 1.00                  | 3.00 | 9.00  | 1.00 | 0.50  | 2.17  | 1.00                                | 5.88   | Increase                   | Increase          |
| TIFA     | 0.76             | 0.38 | 0.09 | 5.91  | 3.84  | 0.40 | 1.00                  | 0.50 | 0.12  | 1.00 | 0.65  | 0.07  | 1.00                                | 0.97   | Decrease                   | Decrease          |
| TNN      | 0.32             | 0.38 | 1.34 | 5.63  | 8.15  | 3.74 | 1.00                  | 1.19 | 4.19  | 1.00 | 1.45  | 0.66  | 1.00                                | 1.56   | Decrease                   | Increase          |
| TNRC6A   | 1.33             | 1.04 | 2.34 | 9.47  | 18.00 | 2.35 | 1.00                  | 0.78 | 1.76  | 1.00 | 1.90  | 0.25  | 1.00                                | 0.72   | Decrease                   | Decrease          |
| TUBB3    | 0.04             | 0.04 | 0.04 | 0.18  | 0.20  | 0.08 | 1.00                  | 1.00 | 1.00  | 1.00 | 1.11  | 0.44  | 1.00                                | 1.55   | Decrease                   | Increase          |
| UAP56    | 0.01             | 0.01 | 0.62 | 0.02  | 0.33  | 0.78 | 1.00                  | 1.00 | 62.00 | 1.00 | 16.50 | 39.00 | 1.00                                | 2.01   | Increase                   | Increase          |
| USP48    | 0.07             | 0.08 | 0.21 | 0.68  | 1.12  | 0.18 | 1.00                  | 1.14 | 3.00  | 1.00 | 1.65  | 0.26  | 1.00                                | 0.79   | Decrease                   | Decrease          |
| YBEY     | 0.21             | 0.18 | 0.09 | 2.53  | 1.32  | 0.15 | 1.00                  | 0.86 | 0.43  | 1.00 | 0.52  | 0.06  | 1.00                                | 0.93   | Decrease                   | Decrease          |
| YTHDF3   | 1.72             | 1.57 | 2.07 | 12.00 | 23.00 | 3.64 | 1.00                  | 0.91 | 1.20  | 1.00 | 1.92  | 0.30  | 1.00                                | 0.76   | Decrease                   | Decrease          |
| ZBTB21   | 0.03             | 0.14 | 0.31 | 0.13  | 1.17  | 0.59 | 1.00                  | 4.67 | 10.33 | 1.00 | 9.00  | 4.54  | 1.00                                | 1.19   | Increase                   | Increase          |
| ZC3H12A  | 0.24             | 0.08 | 0.13 | 1.06  | 1.19  | 0.25 | 1.00                  | 0.33 | 0.54  | 1.00 | 1.12  | 0.24  | 1.00                                | 2.75   | Decrease                   | Increase          |
| ZFP36L1  | 0.17             | 0.19 | 2.55 | 1.66  | 3.55  | 2.46 | 1.00                  | 1.12 | 15.00 | 1.00 | 2.14  | 1.48  | 1.00                                | 4.54   | Increase                   | Increase          |
| ZNF12    | 0.20             | 0.18 | 0.35 | 13.00 | 3.16  | 0.35 | 1.00                  | 0.90 | 1.75  | 1.00 | 0.24  | 0.03  | 1.00                                | 0.99   | Decrease                   | Decrease          |

Dark grey = low expression

**Table S2. List of transcripts with differentially modified m<sup>6</sup>A peaks during KSHV lytic replication.** Differentially modified m<sup>6</sup>A peaks were determined relative to stable m<sup>6</sup>A peaks within the same transcript during KSHV lytic replication. Raw and relativized to 0h peak intensity values are listed for the differentially modified m<sup>6</sup>A peak within each cellular transcript. Sites where m<sup>6</sup>A peaks were called significant by m<sup>6</sup>A viewer software are highlighted in blue. The overall change in methylation is also included.

| Gene names | Lytic/Latent ratio                         |
|------------|--------------------------------------------|
| FLOT2      | 26.72925764                                |
| SRRM1      | 6.875840979                                |
| POLR1G     | 4.852941176                                |
| ACTL8      | 4.740740741                                |
| FLOT1      | 4.205438066                                |
| SCAF4      | 3.354297694                                |
| LUC7L3     | 3.269565217                                |
| PINX1      | 2.61774744                                 |
| WDR6       | 2.212                                      |
| EWSR1      | 1.787741203                                |
| ARC        | 1.782608696                                |
| CD44       | Interaction exclusive to lytic replication |
| FUBP1      | Interaction exclusive to lytic replication |
| PPIF       | Interaction exclusive to lytic replication |
| VDAC1      | Interaction exclusive to lytic replication |
| VDAC2      | Interaction exclusive to lytic replication |
| VDAC3      | Interaction exclusive to lytic replication |

**Table S3. List of host cell proteins with enhanced interaction GPCR5A during KSHV lytic replication.** Global quantitative proteomic analysis was performed on FLAG immunoprecipitates from latent and reactivated TREX BCBL-1 cell lysates. Proteins with an enhanced interaction with GPCR5A during lytic replication are listed.
